# Supplementary material for: C-terminal Src Kinase Gates Homeostatic Synaptic Plasticity and Regulates Fasciclin II Expression at the Drosophila Neuromuscular Junction
Source: PubMed Central journal article supplement (PMC4764653; doi:10.1371/journal.pgen.1005886), 2016-02-22
Supplement: pgen.1005886.s001.pdf [file pgen.1005886.s001.pdf]

| Genotype                                                                                                                           | mEPSP (mV)  | EPSP (mV)   | QC (Stats *)             | NLS QC (Stats *)                    | I <sub>R</sub> (MΩ) | RMP (mV)    | n  | Fig          |
|------------------------------------------------------------------------------------------------------------------------------------|-------------|-------------|--------------------------|-------------------------------------|---------------------|-------------|----|--------------|
| <i>w</i> <sup>1118</sup> (Wild Type)                                                                                               | 0.86 ± 0.05 | 32.7 ± 1.4  | 40.5 ± 2.4               | 74.4 ± 5.8                          | 6.4 ± 0.4           | -63.3 ± 0.9 | 23 |              |
| <i>w</i> ; <i>GluRIIA</i> <sup>SP16</sup>                                                                                          | 0.34 ± 0.01 | 22.3 ± 0.7  | <b>66.9 ± 3.0</b> ***    | <b>97.0 ± 4.9</b> **                | 7.0 ± 0.5           | -63.9 ± 0.7 | 19 | 1,3,4<br>6,7 |
| <i>w</i> <sup>1118</sup> , PhTx 10 min                                                                                             | 0.41 ± 0.02 | 29.3 ± 1.1  | <b>73.6 ± 5.8</b> ***    | <b>125.5 ± 12.2</b> **              | 5.0 ± 0.3           | -62.9 ± 0.5 | 11 | 1            |
| <b>Muscle and Neurons: C155/Y; Sca/+; BG57/+</b>                                                                                   | 0.83 ± 0.06 | 37.9 ± 1.0  | 48.5 ± 3.4               | 97.9 ± 7.5                          | 8.8 ± 0.4           | -66.0 ± 0.9 | 15 | 4            |
| <i>C155/Y; Sca/+; BG57, GluRIII-RNAi/+</i>                                                                                         | 0.48 ± 0.02 | 34.5 ± 0.8  | <b>73.9 ± 2.7</b> ***    | <b>139.7 ± 5.4</b> ***              | 7.3 ± 0.6           | -63.7 ± 0.4 | 25 | 1,4,6        |
| <i>C155/Y; Sca/+; BG57/Csk-RNAi</i>                                                                                                | 0.92 ± 0.06 | 34.8 ± 1.3  | 39.0 ± 2.3               | 71.7 ± 5.0                          | 5.9 ± 0.3           | -66.9 ± 1.3 | 10 |              |
| <i>C155/Y; Sca/+; BG57, GluRIII-RNAi/Csk-RNAi</i>                                                                                  | 0.54 ± 0.04 | 23.4 ± 2.4  | <b>43.0 ± 3.4</b> ns     | <b>65.8 ± 7.4</b> ns                | 5.8 ± 0.3           | -65.4 ± 1.2 | 13 | 1            |
| <i>Csk</i> <sup>c04256</sup>                                                                                                       | 0.80 ± 0.07 | 36.4 ± 1.8  | 47.9 ± 5.4               | 89.1 ± 12.0                         | 6.0 ± 0.3           | -70.5 ± 1.7 | 11 | 3            |
| <i>GluRIIA</i> <sup>SP16</sup> ; <i>Csk</i> <sup>c04256</sup>                                                                      | 0.27 ± 0.01 | 15.7 ± 1.3  | <b>58.0 ± 4.7</b> ns     | <b>75.7 ± 7.5</b> ns                | 5.7 ± 0.4           | -63.2 ± 0.8 | 11 | 1            |
| <i>Csk</i> <sup>c04256</sup> , PhTx 10 min                                                                                         | 0.47 ± 0.03 | 35.3 ± 2.0  | <b>76.5 ± 4.2</b> ***    | <b>141.0 ± 11.4</b> **              | 5.3 ± 0.3           | -68.9 ± 1.2 | 10 | 1            |
| <i>Csk</i> <sup>c04256</sup> / <i>Csk</i> <sup>j1D8</sup>                                                                          | 0.76 ± 0.06 | 29.7 ± 1.2  | 40.9 ± 2.6               | 67.1 ± 4.4                          | 5.6 ± 0.3           | -66.8 ± 1.0 | 10 | 3            |
| <i>GluRIIA</i> <sup>SP16</sup> ; <i>Csk</i> <sup>c04256/j1D8</sup>                                                                 | 0.39 ± 0.02 | 14.1 ± 1.8  | <b>37.2 ± 5.2</b> ns     | <b>47.1 ± 7.2</b> *(low)            | 8.8 ± 0.7           | -68.5 ± 1.5 | 10 | 1            |
| <i>cac</i> <sup>S/+</sup>                                                                                                          | 0.74 ± 0.02 | 29.9 ± 1.4  | 42.1 ± 3.0               | 74.0 ± 7.0                          | 5.0 ± 0.2           | -62.8 ± 0.6 | 25 |              |
| <i>cac</i> <sup>S/+</sup> ; <i>GluRIIA</i> <sup>SP16</sup>                                                                         | 0.32 ± 0.01 | 15.9 ± 0.09 | <b>50.4 ± 3.3</b> *      | 66.3 ± 5.1                          | 5.8 ± 0.2           | -67.8 ± 0.8 | 31 | 1            |
| <i>Csk</i> <sup>j1D8/+</sup>                                                                                                       | 0.85 ± 0.08 | 32.1 ± 1.5  | 41.1 ± 4.0               | 75.6 ± 8.7                          | 6.5 ± 0.7           | -63.7 ± 0.8 | 10 |              |
| <i>GluRIIA</i> <sup>SP16</sup> ; <i>Csk</i> <sup>j1D8/+</sup>                                                                      | 0.32 ± 0.02 | 18.9 ± 1.2  | <b>61.7 ± 5.3</b> **     | 84.9 ± 8.7                          | 7.7 ± 0.7           | -62.8 ± 0.7 | 11 | 1            |
| <i>cac</i> <sup>S/+</sup> ; <i>Csk</i> <sup>j1D8/+</sup>                                                                           | 0.71 ± 0.02 | 32.2 ± 0.1  | 45.8 ± 2.0               | 82.4 ± 4.8                          | 4.6 ± 0.3           | -63.5 ± 0.6 | 10 |              |
| <i>cac</i> <sup>S/+</sup> ; <i>GluRIIA</i> <sup>SP16</sup> ; <i>Csk</i> <sup>j1D8/+</sup>                                          | 0.30 ± 0.02 | 9.8 ± 1.4   | <b>33.6 ± 5.1</b> *(low) | <b>40.0 ± 6.6</b> ***(low)          | 6.8 ± 0.6           | -62.9 ± 0.8 | 11 | 1            |
| <b>Src64B Muscle: UAS-Src64B</b> <sup>UY1332</sup> / <i>BG57</i> 25°C                                                              | 0.80 ± 0.05 | 35.3 ± 2.3  | 45.0 ± 2.7               | 96.7 ± 15.0                         | 6.4 ± 0.4           | -65.9 ± 3.9 | 9  |              |
| <i>GluRIIA</i> <sup>SP16</sup> ; <i>UAS-Src64B</i> <sup>UY1332</sup> / <i>BG57</i> 25°C                                            | 0.33 ± 0.01 | 17.2 ± 1.8  | <b>52.0 ± 4.8</b> ns     | <b>63.1 ± 8.2</b> ns                | 7.3 ± 0.4           | -66.2 ± 0.9 | 8  | 4            |
| <b>Src64B Neur.: C155; UAS-Src64B</b> <sup>UY1332</sup> 25°C                                                                       | 1.08 ± 0.06 | 35.4 ± 1.5  | 33.4 ± 2.3               | 64.2 ± 6.2                          | 7.9 ± 0.8           | -65.7 ± 1.6 | 10 |              |
| <i>C155; GluRIIA</i> <sup>SP16</sup> ; <i>UAS-Src64B</i> <sup>UY1332</sup> 25°C                                                    | 0.43 ± 0.6  | 21.7 ± 2.1  | <b>60.6 ± 11.5</b> *     | <b>89.1 ± 19.2</b> <sup>p=0.2</sup> | 7.5 ± 1.1           | -65.7 ± 1.2 | 8  | 4            |
| <b>Src42A Muscle: UAS-Src42A</b> <sup>WT</sup> ; <i>BG57/+</i> 18°C                                                                | 0.69 ± 0.03 | 31.1 ± 1.0  | 45.4 ± 2.2               | 80.3 ± 5.6                          | 5.2 ± 0.4           | -63.0 ± 0.8 | 9  |              |
| <i>UAS-Src42A</i> <sup>WT</sup> ; <i>GluRIIA</i> <sup>SP16</sup> ; <i>BG57/+</i> 18°C                                              | 0.30 ± 0.02 | 15.8 ± 1.2  | <b>54.2 ± 4.4</b> ns     | <b>70.4 ± 7.2</b> ns                | 5.1 ± 0.4           | -61.9 ± 0.5 | 9  | 4            |
| <b>Src42A Muscle: UAS-Src42A</b> <sup>YF</sup> ; <i>MHC/+</i> 18°C                                                                 | 0.77 ± 0.07 | 31.5 ± 3.5  | 42.1 ± 5.2               | 75.9 ± 12.0                         | 7.9 ± 0.7           | -65.9 ± 1.6 | 7  |              |
| <i>UAS-Src42A</i> <sup>YF</sup> ; <i>GluRIIA</i> <sup>SP16</sup> ; <i>MHC/+</i> 18°C                                               | 0.33 ± 0.02 | 17.0 ± 2.0  | <b>56.3 ± 8.1</b> ns     | <b>77.6 ± 13.5</b> ns               | 8.0 ± 0.7           | -62.9 ± 0.6 | 10 | 4            |
| <b>Src 42A Neur: OK371/+; UAS-Src42A</b> <sup>YF/+</sup> 18°C                                                                      | 0.89 ± 0.07 | 32.9 ± 1.2  | 38.7 ± 3.2               | 69.5 ± 6.4                          | 5.8 ± 0.6           | -65.0 ± 0.9 | 10 |              |
| <i>OK371, GluRIIA</i> <sup>SP16</sup> /+; <i>GluRIIA</i> <sup>SP16</sup> ; <i>UAS-Src42A</i> <sup>YF/+</sup> 18°C                  | 0.35 ± 0.02 | 27.3 ± 1.9  | <b>81.0 ± 8.2</b> *      | <b>134.6 ± 17.1</b> **              | 9.3 ± 0.8           | -62.0 ± 0.6 | 7  | 4            |
| <i>Src42A</i> <sup>k10108/+</sup> ; <i>Csk</i> <sup>c04256</sup>                                                                   | 0.75 ± 0.05 | 32.7 ± 1.7  | 45.4 ± 4.2               | 83.7 ± 7.7                          | 5.1 ± 0.3           | -62.9 ± 0.6 | 9  |              |
| <i>Src42A</i> <sup>k10108</sup> ; <i>GluRIIA</i> <sup>SP16</sup> /+; <i>GluRIIA</i> <sup>SP16</sup> ; <i>Csk</i> <sup>c04256</sup> | 0.37 ± 0.02 | 19.5 ± 5.0  | <b>54.2 ± 8.7</b> ns     | 84.0 ± 11.5                         | 5.9 ± 0.5           | -66.7 ± 0.9 | 12 | 4            |

| Genotype                                                                                                                                  | mEPSP (mV)  | EPSP (mV)   | QC (Stats *)                        | NLS QC (Stats *)                       | I <sub>R</sub> (MΩ) | RMP (mV)    | n  | Fig |
|-------------------------------------------------------------------------------------------------------------------------------------------|-------------|-------------|-------------------------------------|----------------------------------------|---------------------|-------------|----|-----|
| <i>Src64B</i> <sup>KO</sup> , <i>Csk</i> <sup>c04256/+</sup> , <i>Csk</i> <sup>j1D8</sup>                                                 | 0.63 ± 0.05 | 29.7 ± 1.7  | 48.2 ± 4.2                          | 82.8 ± 8.5                             | 4.1 ± 0.1           | -63.1 ± 0.7 | 7  |     |
| <i>GluRIIA</i> <sup>SP16</sup> ; <i>Src64B</i> <sup>KO</sup> , <i>Csk</i> <sup>c04256/+</sup> , <i>Csk</i> <sup>j1D8</sup>                | 0.32 ± 0.02 | 19.8 ± 1.1  | <b>63.8 ± 3.9</b> *                 | 86.9 ± 6.4                             | 6.9 ± 0.4           | -66.4 ± 1.1 | 14 | 4   |
| <i>Src42A</i> <sup>k10108/+</sup>                                                                                                         | 0.89 ± 0.07 | 38.2 ± 1.1  | 44.9 ± 3.2                          | 89.8 ± 7.1                             | 6.3 ± 0.6           | -67.0 ± 1.2 | 10 |     |
| <i>Src42A</i> <sup>k10108</sup> , <i>GluRIIA</i> <sup>SP16/+</sup> , <i>GluRIIA</i> <sup>SP16</sup>                                       | 0.41 ± 0.03 | 25.5 ± 2.8  | <b>64.3 ± 7.0</b> **                | 101.5 ± 12.9                           | 6.8 ± 0.9           | -67.9 ± 1.7 | 14 | 4   |
| <i>Src64B</i> <sup>KO/+</sup>                                                                                                             | 0.90 ± 0.06 | 36.4 ± 1.6  | 41.3 ± 2.1                          | 79.8 ± 5.2                             | 5.8 ± 0.5           | -66.0 ± 1.4 | 9  |     |
| <i>GluRIIA</i> <sup>SP16</sup> ; <i>Src64B</i> <sup>KO/+</sup>                                                                            | 0.42 ± 0.04 | 22.2 ± 2.5  | <b>58.6 ± 8.6</b> <sup>p=0.08</sup> | 89.2 ± 14.7                            | 6.7 ± 0.5           | -64.3 ± 0.9 | 10 | 4   |
| <b>Musc &amp; Neur:</b> <i>UAS-Csk-YFP/C155</i> ; <i>Sca</i> +/+; <i>BG57</i> +/+                                                         | 1.04 ± 0.06 | 26.1 ± 0.2  | 25.2 ± 0.6                          | 39.7 ± 1.0                             | 6.9 ± 0.1           | -66.2 ± 0.2 | 11 | 5   |
| <i>UAS-Csk-YFP/C155</i> ; <i>Sca</i> +/+; <i>BG57</i> , <i>GluRIII-RNAi</i> +/+                                                           | 0.52 ± 0.02 | 28.5 ± 3.5  | <b>54.7 ± 6.6</b> ***               | <b>91.8 ± 14.5</b> ***                 | 5.7 ± 0.3           | -65.8 ± 1.1 | 9  | 5   |
| <i>UAS-Csk-YFP</i> ; <i>Csk</i> <sup>c04256/Csk</sup> <sup>j1D8</sup>                                                                     | 0.86 ± 0.03 | 36.3 ± 1.5  | 42.8 ± 2.2                          | 83.3 ± 6.6                             | 6.6 ± 0.3           | -66.5 ± 1.1 | 11 |     |
| <i>UAS-Csk-YFP</i> ; <i>GluRIIA</i> <sup>SP16</sup> ; <i>Csk</i> <sup>c04256/j1D8</sup>                                                   | 0.38 ± 0.01 | 13.5 ± 1.7  | <b>35.1 ± 4.4</b> <sup>ns</sup>     | <b>44.2 ± 6.3</b> *** <sup>(low)</sup> | 7.8 ± 0.5           | -63.4 ± 0.7 | 8  | 5   |
| <b>Mus Rescue:</b> <i>UAS-Csk-YFP</i> ; <i>MyoD</i> +/+; <i>Csk</i> <sup>c04256/j1D8</sup>                                                | 0.96 ± 0.07 | 35.0 ± 0.08 | 38.3 ± 3.6                          | 72.6 ± 8.1                             | 5.3 ± 0.4           | -65.2 ± 0.4 | 9  |     |
| <i>UAS-Csk-YFP</i> ; <i>MyoD</i> het; <i>GluRIIA</i> <sup>SP16</sup> ; <i>Csk</i> <sup>c04256/j1D8</sup>                                  | 0.43 ± 0.02 | 28.1 ± 1.7  | <b>67.1 ± 7.2</b> **                | <b>110.9 ± 16.0</b> *                  | 6.1 ± 0.4           | -65.2 ± 1.4 | 8  | 5   |
| <b>Neur. Rescue:</b> <i>UAS-Csk-YFP</i> ; <i>OK371</i> +/+; <i>Csk</i> <sup>c04256/j1D8</sup>                                             | 1.05 ± 0.08 | 40.8 ± 1.1  | 40.5 ± 3.1                          | 80.7 ± 7.6                             | 4.7 ± 0.3           | -72.6 ± 1.2 | 8  |     |
| <i>UAS-Csk-YFP</i> ; <i>OK371</i> , <i>GluRIIA</i> <sup>SP16/+</sup> , <i>GluRIIA</i> <sup>SP16</sup> ; <i>Csk</i> <sup>c04256/j1D8</sup> | 0.45 ± 0.4  | 26.6 ± 1.0  | <b>62.4 ± 6.0</b> **                | 99.1 ± 11.3                            | 6.3 ± 0.6           | -63.5 ± 1.0 | 8  | 5   |
| <b>Muscle RNAi:</b> <i>BG57/Csk-RNAi</i>                                                                                                  | 0.71 ± 0.06 | 33.3 ± 1.8  | 48.3 ± 2.9                          | 85.1 ± 6.6                             | 5.9 ± 0.6           | -68.9 ± 1.3 | 8  |     |
| <i>GluRIIA</i> <sup>SP16</sup> ; <i>BG57/Csk-RNAi</i>                                                                                     | 0.36 ± 0.02 | 21.7 ± 1.3  | <b>62.9 ± 5.5</b> *                 | <b>90.8 ± 9.6</b> <sup>ns</sup>        | 6.1 ± 0.2           | -64.8 ± 1.6 | 11 | 5   |
| <b>Neuronal RNAi:</b> <i>C155Y</i> ; <i>Csk-RNAi</i> +/+                                                                                  | 0.81 ± 0.03 | 32.8 ± 1.5  | 42.1 ± 3.1                          | 79.9 ± 8.2                             | 4.6 ± 0.2           | -62.0 ± 0.4 | 7  |     |
| <i>C155Y</i> ; <i>GluRIIA</i> <sup>SP16</sup> ; <i>Csk-RNAi</i> +/+                                                                       | 0.37 ± 0.03 | 26.6 ± 1.0  | <b>77.3 ± 8.4</b> ***               | <b>124.6 ± 15.3</b> *                  | 5.9 ± 0.7           | -62.3 ± 0.5 | 9  | 5   |
| <b>Musc &amp; Neur:</b> <i>C155/FasII</i> <sup>EP1462</sup> ; <i>Sca</i> +/+; <i>BG57</i> +/+                                             | 0.57 ± 0.1  | 34.3 ± 1.1  | 63.1 ± 5.0                          | 118.4 ± 10.1                           | 4.9 ± 0.2           | -63.9 ± 0.8 | 8  |     |
| <i>C155/FasII</i> <sup>EP1462</sup> ; <i>Sca</i> +/+; <i>BG57</i> , <i>GluRIII-RNAi</i> +/+                                               | 0.36 ± 0.02 | 27.5 ± 0.7  | <b>78.5 ± 4.8</b> *                 | 126.0 ± 7.8                            | 5.3 ± 0.5           | -63.1 ± 0.6 | 8  | 8   |
| <b>Muscle FasII O/E:</b> <i>FasII</i> <sup>EP1462</sup> ; <i>BG57</i> +/+                                                                 | 0.48 ± 0.02 | 33.2 ± 1.2  | 69.9 ± 3.4                          | 124.3 ± 6.5                            | 5.4 ± 0.6           | -66.4 ± 1.7 | 9  |     |
| <i>FasII</i> <sup>EP1462</sup> ; <i>GluRIIA</i> <sup>SP16</sup> ; <i>BG57</i> +/+                                                         | 0.22 ± 0.01 | 19.9 ± 1.3  | <b>90.5 ± 6.0</b> *                 | 125.7 ± 11.5                           | 4.4 ± 0.3           | -63.7 ± 1.2 | 8  | 8   |
| <b>Neuron FasII O/E:</b> <i>C155/FasII</i> <sup>EP1462</sup>                                                                              | 1.01 ± 0.27 | 33.8 ± 1.4  | 41.7 ± 4.6                          | 77.8 ± 9.0                             | 5.5 ± 0.5           | -63.1 ± 1.2 | 8  |     |
| <i>C155/FasII</i> <sup>EP1462</sup> ; <i>GluRIIA</i> <sup>SP16</sup>                                                                      | 0.32 ± 0.02 | 19.5 ± 1.6  | <b>64.3 ± 8.6</b> *                 | 91.2 ± 15.4                            | 6.0 ± 0.5           | -63.9 ± 1.0 | 9  | 8   |
| <i>C155Y</i> ; <i>UAS-FasIIA-PEST</i> +/+; <i>Sca</i> ; <i>BG57</i> +/+                                                                   | 0.74 ± 0.06 | 36.0 ± 3.1  | 50.1 ± 4.2                          | 98.3 ± 11.7                            | 8.1 ± 0.9           | -67.1 ± 1.1 | 8  |     |
| <i>C155Y</i> ; <i>UAS-FasIIA-PEST</i> +/+; <i>Sca</i> ; <i>BG57</i> , <i>GluRIII-RNAi</i> +/+                                             | 0.38 ± 0.03 | 29.6 ± 2.2  | <b>80.1 ± 8.4</b> **                | 131.7 ± 16.3                           | 11.3 ± 0.9          | -66.6 ± 3.3 | 8  | 8   |
| <i>C155Y</i> ; <i>UAS-FasIIA-PEST</i> -/; <i>Sca</i> ; <i>BG57</i> +/+                                                                    | 0.72 ± 0.3  | 33.7 ± 2.3  | 46.8 ± 3.1                          | 87.6 ± 8.8                             | 7.1 ± 0.3           | -65.5 ± 1.2 | 8  |     |
| <i>C155Y</i> ; <i>UAS-FasIIA-PEST</i> -/; <i>Sca</i> ; <i>BG57</i> , <i>GluRIII-RNAi</i> +/+                                              | 0.56 ± 0.02 | 35.3 ± 1.2  | <b>63.6 ± 2.8</b> **                | <b>121.4 ± 7.0</b> *                   | 8.6 ± 0.8           | -64.8 ± 0.9 | 8  | 8   |

|                                                                               |             |            |                      |                        |            |             |    |   |
|-------------------------------------------------------------------------------|-------------|------------|----------------------|------------------------|------------|-------------|----|---|
| <i>C155Y; UAS-FasII/C/Sca; BG57/+</i>                                         | 0.63 ± 0.08 | 24.2 ± 2.2 | 40.0 ± 2.9           | 60.5 ± 4.8             | 11.1 ± 1.4 | -62.3 ± 0.9 | 8  |   |
| <i>C155Y; UAS-FasII/C/Sca; BG57, GluRIII-RNAi/+</i>                           | 0.36 ± 0.04 | 23.6 ± 1.8 | <b>70.1 ± 2.6**</b>  | <b>107.9 ± 13.5**</b>  | 8.7 ± 0.9  | -60.1 ± 0.5 | 9  | 8 |
| <i>FasII<sup>EP1462</sup>/UAS-Csk-YFP;; BG57/+</i>                            | 0.50 ± 0.03 | 30.4 ± 1.6 | 61.0 ± 2.4           | 100.8 ± 4.8            | 6.1 ± 0.4  | -67.3 ± 1.9 | 8  |   |
| <i>FasII<sup>EP1462</sup>/UAS-Csk-YFP; GluRIIA<sup>SP16</sup>; BG57 /+</i>    | 0.29 ± 0.03 | 16.7 ± 1.0 | 61.5 ± 6.3           | 79.6 ± 8.8             | 7.0 ± 0.8  | -66.4 ± 2.5 | 8  | 8 |
| <i>FasII<sup>e76</sup>Y</i>                                                   | 1.17 ± 0.11 | 31.8 ± 1.0 | 28.4 ± 1.9           | 51.3 ± 3.7             | 7.8 ± 0.5  | -61.7 ± 0.5 | 9  |   |
| <i>FasII<sup>e76</sup>Y; BG57, GluRIII-RNAi/+</i>                             | 0.60 ± 0.03 | 31.5 ± 1.3 | <b>53.6 ± 2.9***</b> | <b>97.7 ± 8.3**</b>    | 6.5 ± 0.3  | -62.2 ± 0.4 | 12 | 8 |
| <i>FasII<sup>e76</sup>/FasII<sup>G293</sup></i>                               | 0.75 ± 0.06 | 33.0 ± 1.1 | 45.8 ± 3.2           | 84.6 ± 6.0             | 6.4 ± 0.5  | -62.4 ± 0.8 | 9  |   |
| <i>FasII<sup>e76</sup>/FasII<sup>G293</sup>; BG57, GluRIII-RNAi/+</i>         | 0.44 ± 0.02 | 29.2 ± 1.7 | <b>66.1 ± 3.8**</b>  | <b>112.8 ± 9.7*</b>    | 7.1 ± 0.4  | -62.6 ± 0.5 | 9  | 8 |
| <i>C155Y; FasII-RNAI<sup>JF02918</sup>/Sca; BG57/+</i>                        | 0.70 ± 0.04 | 30.7 ± 1.5 | 44.9 ± 2.1           | 77.6 ± 5.1             | 6.3 ± 0.4  | -64.0 ± 0.8 | 8  |   |
| <i>C155Y; FasII-RNAI<sup>JF02918</sup>/Sca; BG57, GluRIII-RNAi/+</i>          | 0.42 ± 0.2  | 25.9 ± 1.4 | <b>62.9 ± 3.8*</b>   | <b>99.8 ± 7.8*</b>     | 6.0 ± 3.8  | -62.0 ± 0.5 | 11 | 8 |
| <i>C155Y; FasII-RNAI<sup>v36351</sup>/Sca; BG57/+</i>                         | 0.67 ± 0.04 | 25.6 ± 1.9 | 39.7 ± 0.1           | 63.1 ± 7.0             | 5.0 ± 0.3  | -62.4 ± 0.5 | 9  |   |
| <i>C155Y; FasII-RNAI<sup>v36351</sup>/Sca; BG57, GluRIII-RNAi/+</i>           | 0.33 ± 0.03 | 27.0 ± 1.0 | <b>85.3 ± 6.2***</b> | <b>135.8 ± 10.4***</b> | 4.4 ± 0.3  | -62.5 ± 0.8 | 7  | 8 |
| <i>FasII<sup>e76</sup>; Csk<sup>c04256/j1D8</sup></i>                         | 0.94 ± 0.10 | 37.8 ± 1.5 | 42.6 ± 3.4           | 85.0 ± 5.4             | 6.9 ± 0.5  | -65.6 ± 1.1 | 8  |   |
| <i>FasII<sup>e76</sup>; GluRIIA<sup>SP16</sup>; Csk<sup>c04256/j1D8</sup></i> | 0.48 ± 0.01 | 29.1 ± 1.9 | <b>60.1 ± 3.5**</b>  | 99.5 ± 9.3             | 7.9 ± 0.7  | -66.2 ± 1.2 | 8  | 9 |

**S1 Table: Raw electrophysiological data measuring synaptic homeostasis.** For each experiment, a homeostatic challenge was utilized (*GluRIII* RNAi-mediated knock down, *GluRIIA*<sup>SP16</sup> mutation, or PhTox). Control genotypes lack a homeostatic challenge and are paired next to genetically matched, challenged experimental genotypes. Values are mean ± SEM. mEPSP (average miniature excitatory postsynaptic potential); EPSP (average excitatory postsynaptic potential); QC (average quantal content); NLS QC (average QC corrected for non-linear summation); I<sub>r</sub> (average muscle input resistance); RMP (average resting membrane potential); n (number of NMJs recorded for the indicated genotype). Some Student T-Test comparisons to control (usually in row directly above) are provided for QC and NLS QC, highlighting results in the main text and figures. Specific *p* values or *p* value ranges match those in the text, figures, and figure legends, with *p* < 0.05 marked as significant (<sup>#</sup> *p* = 0.05; \* *p* < 0.05; \*\* *p* < 0.01; \*\*\* *p* < 0.001). Statistical tests marked with an accompanying '(low)' symbol indicated that QC or NLS QC is actually significantly depressed from baseline when there is a homeostatic challenge.

Various GAL4 drivers were used for *GAL4/UAS* expression experiments. The lines (and tissues) abbreviated in the table are as follows. All GAL4 drivers were used in a heterozygous condition.

*C155* – *elav(C155)-Gal4* (pan-neuronal, post-mitotic neurons)  
*Sca* – *Scabrous-Gal4* (neuronal)  
*OK371* – *OK371-Gal4* (motor neurons)  
*BG57* – *BG57-Gal4* (also known as *C57-Gal4*; muscles)  
*MHC* – *MHC-Gal4* (muscles)  
*MyoD* – *MyoD-Gal4* (also known as *nau-Gal4*; muscles)
